# Supplementary material for: Salvianolic Acid A Improves Rat Kidney Injury by Regulating MAPKs and TGF-β1/Smads Signaling Pathways
Source: MDPI journal article supplement (doi:10.3390/molecules28083630), 2023-04-21
Supplement: s1 [file s1]

**Table 1.** The target genes of SAA.

| TCMSP  | Swiss Target Prediction | Genecards |         | 237 SAA target genes |          |         |         |         |         |         |
|--------|-------------------------|-----------|---------|----------------------|----------|---------|---------|---------|---------|---------|
| F10    | AKR1B10                 | PPARA     | MET     | MAPK14               | GSTP1    | MAOB    | ISG20   | HSPA8   | ADH1B   | ACP3    |
| F7     | FYN                     | CASP3     | ATF2    | CFB                  | EGFR     | PPARG   | AMD1    | ADAM17  | LDHB    | ESRRG   |
| PTPN1  | AKR1B1                  | MYC       | EIF2AK3 | MAPKAPK2             | TREM1    | PDE4B   | PTPN1   | APCS    | B3GAT1  | PDHB    |
| PRSS1  | TDP1                    | MAPK1     | ACHE    | FAP                  | RIDA     | CDK2    | FABP4   | HSD11B1 | TYMS    | PCK1    |
| AKT1   | AKR1B15                 | NOS3      | BMP7    | BCHE                 | DDX6     | AKR1B1  | MMP8    | SORD    | MMP13   | HDAC8   |
| CCND1  | AKR1A1                  | MMP2      | PHB1    | STS                  | RTN4R    | CTSS    | PAH     | MTHFD1  | LPA     | AKR1C1  |
| BCL2L1 | AKR1E2                  | HMGCR     | SMAD3   | APOA2                | MMP3     | BACE1   | DHODH   | AR      | NR3C2   | SULT2A1 |
| CDKN1B | YES1                    | ABCB1     | PRMT1   | CDK5R1               | ESR2     | CA12    | F10     | GATM    | PARP1   | ADK     |
| EIF6   | FGR                     | MTOR      | VLDLR   | CMA1                 | PRDX5    | QPCT    | IGLV2-8 | PPARD   | ARF1    | PDE5A   |
| CASP3  | SRC                     | NR1I2     | SIK2    | TTR                  | GBA      | CHEK1   | CHIT1   | YARS1   | CBR1    |         |
|        | FRK                     | AKT1      | DAB2    | CA2                  | PPIA     | LCN2    | PRKACA  | PNPO    | C1R     |         |
|        | MMP1                    | MAPK14    | TEP1    | PNP                  | SELP     | FCAR    | PDPK1   | KIF5B   | CRAT    |         |
|        | MMP2                    | HSPA5     | ERP29   | ESR1                 | ANG      | AKR1C3  | PLK1    | AZGP1   | CDK6    |         |
|        | MMP3                    | VCAM1     |         | NPR3                 | ICAM2    | DAPK1   | ADH1C   | TYMP    | FGFR2   |         |
|        | MMP9                    | MAPK3     |         | MAPK10               | MIF      | GSR     | PPP5C   | HSD17B1 | NMNAT3  |         |
|        |                         | MAPK8     |         | MAPK8                | CASP3    | KIF11   | EEA1    | GC      | GSK3B   |         |
|        |                         | TGFB1     |         | ALB                  | NQO2     | CTSB    | ME2     | LGALS7  | DHFR    |         |
|        |                         | MMP1      |         | NR1H2                | CA1      | AMY1A   | BCAT2   | LGALS7B | AHCY    |         |
|        |                         | ACE       |         | PIM1                 | NOS3     | AMY1B   | SHBG    | ADH5    | SYK     |         |
|        |                         | CTNNB1    |         | SRC                  | TGFB2    | AMY1C   | BMP7    | RXRA    | FNTA    |         |
|        |                         | ATF6      |         | CLPP                 | HSD17B11 | CASP7   | KDR     | NQO1    | IMPDH2  |         |
|        |                         | MIR106B   |         | PGR                  | MAPK1    | PDE4D   | CSNK2A1 | RAC2    | PLAU    |         |
|        |                         | CDH5      |         | CCNA2                | CTSD     | MTAP    | LTF     | SEC14L2 | DPP4    |         |
|        |                         | TAGLN2    |         | SNRPA                | CSNK1G2  | FGFR1   | CFD     | MMP12   | LTA4H   |         |
|        |                         | DUSP6     |         | F2                   | CTSV     | TGFB1   | ANXA5   | PYGL    | CDA     |         |
|        |                         | MIR660    |         | EPHB4                | HSP90AA1 | KYAT1   | IGF1R   | PSPH    | LCK     |         |
|        |                         | SERPINE1  |         | FRK                  | MAPK3    | AIFM1   | CDH5    | CCND1   | AKR1C2  |         |
|        |                         | SHC1      |         | MMP1                 | TGFB1    | SIRT1   | TAGLN2  | BCL2L1  | ELANE   |         |
|        |                         | GOT1      |         | MMP2                 | ACE      | ATF2    | DUSP6   | CDKN1B  | MET     |         |
|        |                         | ATF4      |         | MMP9                 | CTNNB1   | EIF2AK3 | DAB2    | EIF6    | CTSK    |         |
|        |                         | PPIA      |         | PPARA                | SERPINE1 | ACHE    | TEP1    | AKR1B10 | RBP4    |         |
|        |                         | CREB1     |         | MYC                  | SHC1     | PHB1    | ERP29   | FYN     | CYP2C9  |         |
|        |                         | EIF4EBP1  |         | HMGCR                | GOT1     | SMAD3   | MIR660  | TDP1    | DCK     |         |
|        |                         | EDN1      |         | ABCB1                | ATF4     | PRMT1   | OTC     | AKR1B15 | UCK2    |         |
|        |                         | AKR1B1    |         | MTOR                 | CREB1    | VLDLR   | F7      | AKR1A1  | AGXT    |         |
|        |                         | RB1       |         | NR1I2                | EIF4EBP1 | SIK2    | PRSS1   | AKR1E2  | PLA2G2A |         |
|        |                         | AIFM1     |         | HSPA5                | EDN1     | ATF6    | AKT1    | YES1    | CTNNA1  |         |
|        |                         | SIRT1     |         | VCAM1                | RB1      | MIR106B | AKT1    | FGR     | ARSA    |         |

**Table 2.** The target genes of CKD.

| 1361 CKD target genes |                 |                 |                     |                 |                 |                     |
|-----------------------|-----------------|-----------------|---------------------|-----------------|-----------------|---------------------|
| <i>PKD1</i>           | <i>SERPINA1</i> | <i>BRCA2</i>    | <i>SLC17A5</i>      | <i>CRB2</i>     | <i>MIR145</i>   | <i>FGFR3</i>        |
| <i>PKHD1</i>          | <i>ABL1</i>     | <i>DYNC2H1</i>  | <i>LOC106627981</i> | <i>CPT2</i>     | <i>ENPP1</i>    | <i>HLA-DQA1</i>     |
| <i>PKD2</i>           | <i>NPHP3</i>    | <i>STAT1</i>    | <i>G6PC1</i>        | <i>PRKCSH</i>   | <i>IFNA1</i>    | <i>PSEN2</i>        |
| <i>TP53</i>           | <i>ALG9</i>     | <i>NPHS2</i>    | <i>B2M</i>          | <i>IL2RA</i>    | <i>ABCB1</i>    | <i>EGF</i>          |
| <i>TNF</i>            | <i>ATM</i>      | <i>NAGLU</i>    | <i>PTEN</i>         | <i>MTHFR</i>    | <i>GBE1</i>     | <i>IL1RN</i>        |
| <i>IL6</i>            | <i>CRP</i>      | <i>EGFR</i>     | <i>RYR1</i>         | <i>IL2</i>      | <i>IL18</i>     | <i>CCR6</i>         |
| <i>CYBB</i>           | <i>MMP1</i>     | <i>CCND1</i>    | <i>FAS</i>          | <i>MIR1225</i>  | <i>TNFRSF1A</i> | <i>APOB</i>         |
| <i>UIMOD</i>          | <i>INS</i>      | <i>APOL1</i>    | <i>BCR</i>          | <i>PARK7</i>    | <i>FIG4</i>     | <i>NPPA</i>         |
| <i>HNF1B</i>          | <i>GLA</i>      | <i>KRAS</i>     | <i>SOD1</i>         | <i>PIK3CA</i>   | <i>CST3</i>     | <i>C3</i>           |
| <i>IL10</i>           | <i>SNCA</i>     | <i>HLA-DQB1</i> | <i>VCP</i>          | <i>FLNA</i>     | <i>NOTCH1</i>   | <i>ANO5</i>         |
| <i>TGFB1</i>          | <i>PAX2</i>     | <i>MIR21</i>    | <i>PMP22</i>        | <i>MTOR</i>     | <i>GARS1</i>    | <i>HRAS</i>         |
| <i>ACE</i>            | <i>IL1B</i>     | <i>DZIP1L</i>   | <i>AKT1</i>         | <i>IFT172</i>   | <i>JAG1</i>     | <i>SOX10</i>        |
| <i>APOE</i>           | <i>NPC1</i>     | <i>LRP5</i>     | <i>NEFL</i>         | <i>COL4A1</i>   | <i>HLA-A</i>    | <i>BCL2</i>         |
| <i>TSC2</i>           | <i>NCF4</i>     | <i>PTPN22</i>   | <i>NPHP4</i>        | <i>FCGR2A</i>   | <i>CUBN</i>     | <i>NPC2</i>         |
| <i>CYBA</i>           | <i>NOS3</i>     | <i>SQSTM1</i>   | <i>GDNF</i>         | <i>MIR155</i>   | <i>MIR106B</i>  | <i>THBD</i>         |
| <i>GANAB</i>          | <i>CFH</i>      | <i>TMEM67</i>   | <i>CXCL8</i>        | <i>HLA-DPB1</i> | <i>ERBB2</i>    | <i>MIR20A</i>       |
| <i>NCF2</i>           | <i>MPZ</i>      | <i>VHL</i>      | <i>MEFV</i>         | <i>FGF23</i>    | <i>EDN1</i>     | <i>MIR6511B1</i>    |
| <i>CEP290</i>         | <i>MKS1</i>     | <i>INF2</i>     | <i>PDGFRB</i>       | <i>SEC63</i>    | <i>OFD1</i>     | <i>AQP2</i>         |
| <i>CTLA4</i>          | <i>NLRP3</i>    | <i>PRKN</i>     | <i>FBN1</i>         | <i>IQCB1</i>    | <i>MAPK1</i>    | <i>COMT</i>         |
| <i>HLA-DRB1</i>       | <i>STAT3</i>    | <i>TERT</i>     | <i>CTNNB1</i>       | <i>HEXA</i>     | <i>SLC34A1</i>  | <i>NRAS</i>         |
| <i>RET</i>            | <i>DNAJB11</i>  | <i>APOA1</i>    | <i>IFT140</i>       | <i>SETBP1</i>   | <i>RUNX1</i>    | <i>APC</i>          |
| <i>COL4A5</i>         | <i>NPHP1</i>    | <i>MAPT</i>     | <i>GDAP1</i>        | <i>MME</i>      | <i>IGHMBP2</i>  | <i>FOXP3</i>        |
| <i>NOD2</i>           | <i>TSC1</i>     | <i>CCL2</i>     | <i>AGT</i>          | <i>PON1</i>     | <i>MIR143</i>   | <i>MET</i>          |
| <i>GBA</i>            | <i>CLCN5</i>    | <i>TTC21B</i>   | <i>KIT</i>          | <i>ABCA1</i>    | <i>HSPB1</i>    | <i>NF1</i>          |
| <i>CFTR</i>           | <i>PRNP</i>     | <i>MPO</i>      | <i>GJB1</i>         | <i>BICC1</i>    | <i>MIR126</i>   | <i>NPPB</i>         |
| <i>MUC1</i>           | <i>MIR15A</i>   | <i>TTR</i>      | <i>HBB</i>          | <i>DSTYK</i>    | <i>IGF1</i>     | <i>EDNRA</i>        |
| <i>REN</i>            | <i>TRPV4</i>    | <i>JAK2</i>     | <i>HMOX1</i>        | <i>PPARG</i>    | <i>SLC37A4</i>  | <i>GNAS</i>         |
| <i>COL4A4</i>         | <i>HFE</i>      | <i>INVS</i>     | <i>EPO</i>          | <i>PSAP</i>     | <i>HNF1A</i>    | <i>MYH9</i>         |
| <i>GATA3</i>          | <i>SMPD1</i>    | <i>AGTR1</i>    | <i>MMP9</i>         | <i>ICAM1</i>    | <i>SPP1</i>     | <i>LEP</i>          |
| <i>NCF1</i>           | <i>ATP7B</i>    | <i>FN1</i>      | <i>IL4</i>          | <i>DYNC1H1</i>  | <i>INPP5E</i>   | <i>KIF1B</i>        |
| <i>WT1</i>            | <i>VEGFA</i>    | <i>ABCA4</i>    | <i>COPA</i>         | <i>ALMS1</i>    | <i>CCR5</i>     | <i>PTPN11</i>       |
| <i>GAA</i>            | <i>BRAF</i>     | <i>SH3TC2</i>   | <i>EDNRB</i>        | <i>TLR2</i>     | <i>ELN</i>      | <i>SBF2</i>         |
| <i>ALB</i>            | <i>VWF</i>      | <i>POLG</i>     | <i>F2</i>           | <i>MIR29A</i>   | <i>MIR146A</i>  | <i>GPT</i>          |
| <i>IFNG</i>           | <i>MFN2</i>     | <i>NPHS1</i>    | <i>TNFRSF11B</i>    | <i>AGL</i>      | <i>CFHR5</i>    | <i>MT-ND1</i>       |
| <i>MIR17</i>          | <i>TLR4</i>     | <i>PRX</i>      | <i>WDR19</i>        | <i>MIR223</i>   | <i>IL13</i>     | <i>LCN2</i>         |
| <i>PSEN1</i>          | <i>LRRK2</i>    | <i>ACTN4</i>    | <i>MIR34A</i>       | <i>AHI1</i>     | <i>HTT</i>      | <i>LOC106029312</i> |
| <i>CC2D2A</i>         | <i>COL4A3</i>   | <i>PINK1</i>    | <i>EDN3</i>         | <i>BDNF</i>     | <i>IL17A</i>    | <i>CCL5</i>         |
| <i>APP</i>            | <i>HLA-B</i>    | <i>PRTN3</i>    | <i>IRF5</i>         | <i>NCF4-AS1</i> | <i>DSP</i>      | <i>ADIPOQ</i>       |
| <i>LMNA</i>           | <i>CASR</i>     | <i>BSND</i>     | <i>CLCNKB</i>       | <i>VDR</i>      | <i>NDRG1</i>    | <i>AARS1</i>        |
| <i>MMACHC</i>         | <i>SMAD4</i>    | <i>CFI</i>      | <i>TET2</i>         | <i>PYGM</i>     | <i>MT-ATP6</i>  | <i>MYC</i>          |

|              |          |                |              |         |          |              |
|--------------|----------|----------------|--------------|---------|----------|--------------|
| CD79A        | F5       | OCRL           | LCAT         | PTGS2   | HEXB     | FGFR1        |
| LRSAM1       | LPL      | SERPINA3       | TNFRSF11A    | TARDBP  | CDH1     | DNM2         |
| BBS1         | TLR5     | SPINK1         | CD40LG       | RMND1   | ADRB2    | GFAP         |
| ESR1         | LIPA     | LMX1B          | SREBF1       | MECP2   | CHEK2    | IGF2         |
| LDLR         | MTMR2    | ABCB4          | IL1A         | GATA1   | COL2A1   | CP           |
| RBP4         | MT-TL1   | CYBC1          | MKKS         | PDGFRA  | ALPL     | SEC61A1      |
| C4A          | LITAF    | ASXL1          | MMP2         | G6PD    | BSCL2    | FLT1         |
| MBL2         | SMN1     | CD4            | SDHB         | MT-CYB  | TBX18    | NOTCH2       |
| NEK1         | ADAMTS13 | BRCA1          | NEK8         | ADAM17  | SLC12A3  | CDKN1C       |
| VCAM1        | RRM2B    | FGFR2          | IL10RA       | PLP1    | CD2AP    | ATXN3        |
| MARS1        | CCL11    | RPL36A-HNRNPH2 | COL1A1       | LRP2    | ZAP70    | CLEC7A       |
| FASLG        | TNFSF11  | CASP3          | KCNQ1        | NFKB1   | PRKAG2   | HIF1A        |
| TF           | ACTA2    | AIRE           | PDCD1        | ATXN2   | CTNS     | MUC5B        |
| ACP5         | HNRNPA1  | AR             | ENG          | USH2A   | ATP7A    | RETN         |
| STAT4        | MIR107   | SERPINE1       | F8           | UCHL1   | CAT      | CHAT         |
| FLCN         | PROM1    | EGR2           | IL23R        | PMS2    | HAVCR1   | MEN1         |
| HLA-C        | MORC2    | CDKN2A         | SLC11A1      | NOS2    | LAMP2    | LOC107133510 |
| PKD2L1       | HNF4A    | CFHR1          | RPGRIP1L     | CXCR4   | CASP8    | NTRK1        |
| HP           | TRAF3IP1 | ADA            | MIF          | AVPR2   | MMP3     | HAMP         |
| ELANE        | IL5      | H19            | KL           | CXCL12  | ATP2A2   | CAV1         |
| CD40         | TREX1    | NPHP3-ACAD11   | CCN2         | PLAU    | WFS1     | MFF-DT       |
| TNFRSF1B     | MIR203A  | CD36           | WDR35        | SDCCAG8 | CLN3     | P2RX7        |
| BMP4         | SLC4A1   | DGKE           | PKD1L1       | ECE1    | STAT5B   | SETD2        |
| KCNJ11       | AGXT     | CXCL10         | INSR         | JUP     | PKD3     | PTH          |
| MPL          | GLIS2    | MT-TK          | DMD          | SYNJ1   | TTN      | CSF3         |
| SLC22A12     | SMAD3    | GHRL           | APRT         | MIR122  | MED25    | TGFBF2       |
| PRKAR1A      | GALC     | MIR29C         | PKD2L2       | NSD1    | MT-CO1   | SLC2A9       |
| GPC3         | CSF2     | SAG            | JUN          | CLLS1   | TMEM231  | ITGAM        |
| CSF3R        | IL17F    | FCGR3B         | GLB1         | CLLS3   | TFRC     | FGD4         |
| SST          | ABCC8    | PIK3R1         | GP1BA        | FRAS1   | ADA2     | IFT80        |
| FGF2         | IDUA     | SURF1          | TIMP1        | FLG     | ALG8     | SLC9A3       |
| PBX1         | NR3C1    | SAA1           | PTPRC        | DBT     | TGFB2    | SFTPC        |
| BCKDHB       | ARSA     | SNCAIP         | CYP27A1      | ITGA8   | TG       | AGER         |
| MYH7         | SH2B3    | IRF8           | F9           | GRN     | COL7A1   | TMEM216      |
| OPTN         | SELP     | CALCA          | ABCB11       | BAX     | SLC2A2   | TRPC6        |
| IFNA2        | CLCNKA   | BCS1L          | KCNN4        | SLC12A1 | POMC     | PHKA2        |
| CEP164       | PLG      | CLLS4          | PYGL         | GYS1    | ABCD1    | BMPR2        |
| TTC21B-AS1   | DES      | CLLS5          | PAX6         | SCN5A   | SLC26A1  | BCKDHA       |
| LOC106099062 | ATP2C1   | EP300          | SDHD         | EYA1    | NR3C2    | HLA-G        |
| SHH          | HMGB1    | TH             | NDUFAF6      | IFNGR1  | PLEKHG5  | LTA          |
| DCDC2        | NOTCH3   | RAF1           | HBA2         | ABCA3   | CD46     | F3           |
| GATA4        | H2AC18   | PRF1           | LOC107982234 | KAT6B   | SMARCAL1 | BGLAP        |
| IFIH1        | HPRT1    | CDKN1A         | ACTA1        | BBS10   | RIPK1    | GJB2         |

|           |          |          |          |         |         |              |
|-----------|----------|----------|----------|---------|---------|--------------|
| C9orf72   | KMT2A    | GCK      | LIPC     | CALR    | IL7R    | PRPS1        |
| GGT1      | MT-ND5   | NDP      | ERCC6    | MITF    | SPTLC1  | MIR10A       |
| CREBBP    | PRKCD    | BBS4     | SCARB2   | PEX6    | MT-ND6  | MYH11        |
| MIR132    | MT-ND4   | THPO     | MIR210   | PRSS1   | FUS     | APBB1        |
| ASPA      | CTSD     | MIR181A2 | TBK1     | PLA2G7  | ALOX5   | ETV6         |
| LPA       | LDHA     | ERBB3    | TYMP     | SOST    | MIR140  | TWNK         |
| PFKM      | TP63     | MT-ND2   | TBX5     | COQ8B   | FAM13A  | NLRP1        |
| TBX1      | GSTM1    | FGF8     | CYP27B1  | COL1A2  | STX1A   | NR4A2        |
| MIR141    | GSTP1    | RELA     | RPGR     | BTK     | XIAP    | SLPI         |
| BBS2      | TREM2    | ITGB3    | BMP7     | MIR424  | CACNA1A | U2AF1        |
| GPC4      | SLC19A3  | REST     | GM2A     | ACTG2   | NRIP1   | KRT7         |
| ANKS6     | CCL3     | MIR125A  | SERPINC1 | WNT4    | SCO2    | LOC105371046 |
| ATRX      | HSPB8    | MIR199A1 | PIK3CD   | KAAG1   | YARS1   | LOC110006319 |
| NGF       | CD28     | MIR221   | FCGR2B   | PIK3C2A | IL17RA  | CYP2D6       |
| ZEB2      | PTCH1    | IL1R1    | MYD88    | SOX9    | SOD2    | FAN1         |
| CLCN1     | SELE     | SFTPA1   | SMARCA4  | HBA1    | ABCG5   | JAK1         |
| MYLK      | RYR2     | ICOSLG   | BMP6     | KRT18   | CDH23   | KITLG        |
| CD8A      | RUNX2    | CARD9    | SLC2A1   | POMGNT1 | GAPDH   | TLR9         |
| PKD1-AS1  | ACE2     | FLT3     | IL2RB    | AVP     | NKX2-5  | CLCN7        |
| KIAA0319L | TSHR     | IL12RB1  | AQP1     | FANCD2  | ZNF423  | SLC6A4       |
| MIR192    | GDF6     | HNFJ3    | PRPH2    | IL12A   | SCNN1A  | FGA          |
| PKDREJ    | IGF1R    | TNFSF13B | MIR16-1  | RPGRIP1 | CX3CR1  | TNNT2        |
| LAMB2     | DNAJB2   | SYK      | CLDN16   | KDR     | FREM2   | OGG1         |
| CETP      | VIM      | HSPD1    | SMARCB1  | JAK3    | TNFAIP3 | TNNI3        |
| PCSK9     | NUP107   | C4B      | CHRNA3   | MT-CO3  | NFE2L2  | AHSG         |
| IL12B     | ADM      | CD274    | GNB3     | BEST1   | POT1    | MYCN         |
| IGHG1     | F12      | ABCC2    | SRSF2    | SLC6A3  | MIR142  | CNGB3        |
| PDGFB     | EHHADH   | SLC25A4  | CCR1     | BMP2    | GIGYF2  | SLC22A5      |
| CD19      | CD14     | IGFBP3   | PKD1L2   | SP110   | CYP1B1  | MSH2         |
| HSPA4     | AIFM1    | SMN2     | MVK      | MBTPS2  | HSPG2   | LEPR         |
| NAGA      | ADAR     | KNG1     | TBP      | RAG1    | FHIT    | PPARGC1A     |
| MGP       | ITCH     | CXCR3    | BBS12    | GSN     | PALB2   | SFTPB        |
| COL3A1    | IRF4     | PRMT7    | LBR      | FCGR3A  | CDKN2B  | MIR29B1      |
| CD34      | PHOX2B   | PRKCQ    | BLK      | ACTC1   | CBL     | NFKBIA       |
| RNLS      | RNF213   | DNAH5    | SMAD6    | ADH1C   | PDX1    | TERC         |
| GLE1      | MAP2K1   | LIG4     | HLA-DPA1 | PSMB8   | PRL     | MIR19A       |
| HNRNPA2B1 | HFE-AS1  | MT-ND3   | COL17A1  | EPM2A   | PAX8    | CFHR2        |
| ADD1      | HSP90AA1 | B9D1     | DCTN1    | IL3     | DNAJC13 | MMUT         |
| BBS5      | GATM     | RNASE3   | IL15     | SELL    | NBN     | MLH1         |
| GRHPR     | XPNPEP3  | GLI3     | LIFR     | VPS35   | PTPRO   | CD81         |
| DNASE1    | EPCAM    | FAT4     | ITGB2    | CAV3    | CFHR3   | SLC5A2       |
| EVC2      | PSTPIP1  | SCT      | MIR150   | CIITA   | MIR144  | ABCC6        |
| HTRA2     | XDH      | ACTB     | IL10RB   | POLR2F  | SGPL1   | PEX1         |
| CFTR-AS1  | MAPK14   | PKD1L3   | MPV17    | IL7     | TMEM237 | AFP          |

|                     |                     |                |                 |                     |                 |                       |
|---------------------|---------------------|----------------|-----------------|---------------------|-----------------|-----------------------|
| <i>DNMT1</i>        | <i>ROBO2</i>        | <i>MIR27A</i>  | <i>TYR</i>      | <i>ATG16L1</i>      | <i>TLR3</i>     | <i>HNRNPUL2-BSCL2</i> |
| <i>SP140</i>        | <i>HTR2A</i>        | <i>IFT43</i>   | <i>BCL2L1</i>   | <i>CD38</i>         | <i>GNB1</i>     | <i>CSPP1</i>          |
| <i>KIAA0586</i>     | <i>IL6R</i>         | <i>CEACAM3</i> | <i>CR1</i>      | <i>YWHAE</i>        | <i>VPS13C</i>   | <i>SPG11</i>          |
| <i>MSH6</i>         | <i>RHO</i>          | <i>KARS1</i>   | <i>HSD11B2</i>  | <i>PON2</i>         | <i>CYCS</i>     | <i>FKRP</i>           |
| <i>POLR1C</i>       | <i>ERCC2</i>        | <i>PLAT</i>    | <i>SCN4A</i>    | <i>XK</i>           | <i>SLC7A7</i>   | <i>GUSB</i>           |
| <i>ARHGDIA</i>      | <i>MEG3</i>         | <i>CASP9</i>   | <i>BCHE</i>     | <i>DPP4</i>         | <i>MAGI2</i>    | <i>PLCE1</i>          |
| <i>TNFSF10</i>      | <i>FABP1</i>        | <i>ABCA7</i>   | <i>TCTN3</i>    | <i>FH</i>           | <i>IL21</i>     | <i>FLT4</i>           |
| <i>RAD51C</i>       | <i>LOC111674472</i> | <i>IRAK1</i>   | <i>ERAP1</i>    | <i>MYH6</i>         | <i>SCNN1G</i>   | <i>SGSH</i>           |
| <i>ATRIP</i>        | <i>IKZF3</i>        | <i>LGALS3</i>  | <i>ANXA5</i>    | <i>SAMHD1</i>       | <i>FANCI</i>    | <i>RAG2</i>           |
| <i>DLD</i>          | <i>PHEX</i>         | <i>ERBB4</i>   | <i>CYP3A5</i>   | <i>ATP8B1</i>       | <i>TCTN2</i>    | <i>GLIS3</i>          |
| <i>CD80</i>         | <i>BBS9</i>         | <i>IGFBP1</i>  | <i>CLU</i>      | <i>TRAF3IP2</i>     | <i>RPS15</i>    | <i>GATA2</i>          |
| <i>CASP1</i>        | <i>DNMT3A</i>       | <i>GUCY2D</i>  | <i>SH2D1A</i>   | <i>KCNJ10</i>       | <i>ATP6V1B1</i> | <i>TRIP13</i>         |
| <i>SDHC</i>         | <i>OPA1</i>         | <i>CYP11B2</i> | <i>CD247</i>    | <i>ASAHI</i>        | <i>KRT8</i>     | <i>NDUFS4</i>         |
| <i>CLLU1</i>        | <i>HARS1</i>        | <i>PEX5</i>    | <i>MIR200C</i>  | <i>IL4R</i>         | <i>CEP120</i>   | <i>PEX7</i>           |
| <i>SFTPD</i>        | <i>SCNN1B</i>       | <i>CCND2</i>   | <i>CHGA</i>     | <i>EMP2</i>         | <i>ENO2</i>     | <i>CTRC</i>           |
| <i>PPARA</i>        | <i>PAH</i>          | <i>AGTR2</i>   | <i>KRT5</i>     | <i>SLC22A4</i>      | <i>ABCG8</i>    | <i>PEX12</i>          |
| <i>GJC2</i>         | <i>DRD2</i>         | <i>DYRK1A</i>  | <i>FIP1L1</i>   | <i>HMGCR</i>        | <i>CRB1</i>     | <i>S100A9</i>         |
| <i>CDKN1B</i>       | <i>IL33</i>         | <i>PODXL</i>   | <i>C12orf29</i> | <i>IKBKG</i>        | <i>ITGA3</i>    | <i>GZMB</i>           |
| <i>HSD17B10</i>     | <i>ANLN</i>         | <i>TGFB3</i>   | <i>GCG</i>      | <i>LTF</i>          | <i>CDC73</i>    | <i>PECAM1</i>         |
| <i>SOCS1</i>        | <i>FOS</i>          | <i>MAN2B1</i>  | <i>TPO</i>      | <i>SDHA</i>         | <i>SIX1</i>     | <i>BBS7</i>           |
| <i>PNPLA3</i>       | <i>MYO1E</i>        | <i>ELOVL4</i>  | <i>STX3</i>     | <i>MIR483</i>       | <i>GJA1</i>     | <i>PMM2</i>           |
| <i>CSF1</i>         | <i>STAT5A</i>       | <i>DNAJC6</i>  | <i>GLS</i>      | <i>RNASEH2C</i>     | <i>BCOR</i>     | <i>B9D2</i>           |
| <i>MIR30A</i>       | <i>NCAM1</i>        | <i>LOX</i>     | <i>NEK9</i>     | <i>DICER1</i>       | <i>NR1H4</i>    | <i>CRH</i>            |
| <i>RAD51</i>        | <i>ARID1B</i>       | <i>NIPBL</i>   | <i>IFT27</i>    | <i>GC</i>           | <i>IRS1</i>     | <i>CELIAC5</i>        |
| <i>IFT122</i>       | <i>MLXIPL</i>       | <i>ROBO1</i>   | <i>MB</i>       | <i>SPG7</i>         | <i>UPK3A</i>    | <i>SALL4</i>          |
| <i>CREB1</i>        | <i>FTL</i>          | <i>MMP12</i>   | <i>SLC3A1</i>   | <i>RPL5</i>         | <i>CFB</i>      | <i>GSR</i>            |
| <i>HDAC8</i>        | <i>TRIM2</i>        | <i>NEFH</i>    | <i>CELIAC2</i>  | <i>SOS1</i>         | <i>PSENEN</i>   | <i>RPE65</i>          |
| <i>MIR93</i>        | <i>FOXC1</i>        | <i>S100A8</i>  | <i>PTGS1</i>    | <i>PEX2</i>         | <i>RTEL1</i>    | <i>ACHE</i>           |
| <i>BRIP1</i>        | <i>SYP</i>          | <i>ADAM10</i>  | <i>FGF10</i>    | <i>TRIM28</i>       | <i>SCN2A</i>    | <i>LOC107303340</i>   |
| <i>APOC3</i>        | <i>KCNH2</i>        | <i>TLR1</i>    | <i>GCLC</i>     | <i>CYP1A1</i>       | <i>CD27</i>     | <i>SFTPA2</i>         |
| <i>LOC107548112</i> | <i>TCF4</i>         | <i>IFNB1</i>   | <i>SBF2-AS1</i> | <i>CD59</i>         | <i>SLC26A4</i>  | <i>F7</i>             |
| <i>COQ2</i>         | <i>NPY</i>          | <i>PTH1R</i>   | <i>COL11A1</i>  | <i>APOH</i>         | <i>FANCC</i>    | <i>CELIAC6</i>        |
| <i>CTSB</i>         | <i>ACVRL1</i>       | <i>NPM1</i>    | <i>BTNL2</i>    | <i>S100B</i>        | <i>CELIAC10</i> | <i>CEP83</i>          |
| <i>PDE11A</i>       | <i>LZTFL1</i>       | <i>SMAD2</i>   | <i>TLR7</i>     | <i>GRIN2B</i>       | <i>CELIAC11</i> | <i>IKZF1</i>          |
| <i>NUP93</i>        | <i>KCNJ1</i>        | <i>FREM1</i>   | <i>NHLRC1</i>   | <i>SLC6A19</i>      | <i>CELIAC12</i> | <i>PRDM16</i>         |
| <i>GH1</i>          | <i>AMACR</i>        | <i>MAPK8</i>   | <i>GSK3B</i>    | <i>SLC34A3</i>      | <i>CELIAC7</i>  | <i>CELIAC13</i>       |
| <i>CXCR2</i>        | <i>UGT1A1</i>       | <i>SLC7A9</i>  | <i>RBCK1</i>    | <i>HNMT</i>         | <i>CELIAC8</i>  | <i>CLN6</i>           |
| <i>WAS</i>          | <i>SBF1</i>         | <i>ATP13A2</i> | <i>MIR195</i>   | <i>ALDOB</i>        | <i>CELIAC9</i>  | <i>KMT2D</i>          |
| <i>CYP2C9</i>       | <i>SMC1A</i>        | <i>LRBA</i>    | <i>ATP1A1</i>   | <i>ALAD</i>         | <i>PNPLA2</i>   | <i>TTC8</i>           |
| <i>TNXB</i>         | <i>SLC9A3R1</i>     | <i>CYP2E1</i>  | <i>STXBP2</i>   | <i>PHKB</i>         | <i>CASP10</i>   | <i>DYNC2LI1</i>       |
| <i>EIF4G1</i>       | <i>CDK12</i>        | <i>CRYAA</i>   | <i>NUP133</i>   | <i>LOC111674475</i> | <i>CYP3A4</i>   | <i>C8orf37-AS1</i>    |
| <i>RNASEH2B</i>     | <i>SOX18</i>        | <i>PBRM1</i>   | <i>PDB4</i>     | <i>TRB</i>          | <i>ITGA4</i>    | <i>LINC01804</i>      |
| <i>TNFSF15</i>      | <i>CCHCR1</i>       | <i>FMR1</i>    | <i>SOX11</i>    | <i>SPTAN1</i>       | <i>STAR</i>     | <i>CORIN</i>          |
| <i>BIRC5</i>        | <i>INO80</i>        | <i>FAH</i>     | <i>GSTM3</i>    | <i>DIS3L2</i>       | <i>F11</i>      | <i>ZNF618</i>         |

|         |         |           |         |              |           |          |
|---------|---------|-----------|---------|--------------|-----------|----------|
| NUP205  | ELOVL2  | MECOM     | GALNS   | FLI1         | CSTB      | THEM4    |
| RAC1    | SARS2   | IRF1      | NUP160  | SORL1        | TNFRSF13B | NTAN1    |
| GATA6   | SLC47A1 | PACRG     | PRODH   | ALDH2        | UBD       | DACH1    |
| MMP8    | PTPRN2  | NOS1      | CYP24A1 | ETS1         | PHKG2     | TMEM229B |
| TAP2    | SHBG    | MIR181A1  | ALK     | LOC110806263 | TMEM138   | AHR      |
| MTR     | SLC13A3 | MAOA      | EIF2AK4 | TPP1         | KIRREL2   | ALMS1P1  |
| ITPR1   | TFDP2   | DYNC2I1   | BLM     | STK11        | PLXDC2    | STOX1    |
| PRKG1   | TFPI    | DNAH8     | SF3B1   | FBN2         | FBXL20    | DOK6     |
| MIR214  | C9      | MUC5AC    | ECM1    | PAX4         | SLC22A16  | SLC16A9  |
| NEUROD1 | MYRF    | ERCC1     | ZNF687  | TAP1         | DNAH17    | PDXDC1   |
| RAD21   | TMEM258 | CPLANE1   | CADM3   | MBP          | KYNU      | SYNE2    |
| AFG3L2  | CERS4   | AOC3      | INAVA   | BCL6         | SELENBP1  | DNAJC16  |
| DYNC2I2 | PIP5K1B | IL19      | IL37    | MIR182       | NAT8      | GRIP1    |
| SFRP4   | SHROOM3 | MT2A      | HOXD10  | DDC          | DLGAP2    | GABPA    |
| PGAM2   | SLC22A1 | CDK20     | FARSB   | TMEM126B     | UBE2Q2    | SH2B1    |
| CHCHD2  | SLC22A2 | GCKR      | SGO1    | IRGM         | MMP20     | AOC1     |
| ARPC1B  | CPS1    | CLDN19    | POGLUT1 | SLC17A1      | FADS2     | OTOGL    |
| PRSS2   | WDR37   | DAB2      | GYG1    | GFI1         | RAPGEF5   | SLC13A5  |
| JPH1    | WDR72   | BCAS3     | GNB4    | NOTCH2NLC    | RHD       | ACADL    |
| PMP2    | PDE4D   | MIR1908   | PPM1K   | ACADS        | RHCE      | IGF2R    |
| ZFAT    | SGK1    | LINC01723 | PDE8B   | ASPG         | FOXD3     |          |
| SLURP1  | SLC6A13 | DHX16     | SAR1B   | FADS1        | TNNI3K    |          |

**Table 3.** target genes of CKD and SAA.

| 80 Intersecting Genes |        |        |        |
|-----------------------|--------|--------|--------|
| ABCB1                 | P08183 | IGF1R  | P08069 |
| ACE                   | P12821 | KDR    | P35968 |
| ACHE                  | P22303 | LCN2   | P80188 |
| ADAM17                | P78536 | LPA    | P08519 |
| ADH1C                 | P00326 | LTF    | P02788 |
| AGXT                  | P21549 | MAPK1  | P28482 |
| AIFM1                 | O95831 | MAPK14 | Q16539 |
| AKT1                  | P31749 | MAPK8  | P45983 |
| ALB                   | P02768 | MET    | P08581 |
| ANXA5                 | P08758 | MIF    | P14174 |
| AR                    | P10275 | MMP1   | P03956 |
| ERK                   | P29323 | MMP12  | P39900 |
| BCHE                  | P06276 | MMP2   | P08253 |
| BMP7                  | P18075 | MMP3   | P08254 |
| CASP3                 | P42574 | MMP8   | P22894 |
| CFB                   | P00751 | MMP9   | P14780 |
| CREB1                 | P16220 | MTOR   | P42345 |

|                 |               |                 |               |
|-----------------|---------------|-----------------|---------------|
| <i>CTNNB1</i>   | <i>P35222</i> | <i>MYC</i>      | <i>P01106</i> |
| <i>CTSB</i>     | <i>P07858</i> | <i>NOS3</i>     | <i>P29474</i> |
| <i>CYP2C9</i>   | <i>P11712</i> | <i>NR3C2</i>    | <i>P08235</i> |
| <i>DAB2</i>     | <i>P98082</i> | <i>PAH</i>      | <i>P00439</i> |
| <i>DPP4</i>     | <i>P27487</i> | <i>PDE4D</i>    | <i>Q08499</i> |
| <i>EDN1</i>     | <i>P05305</i> | <i>PLAU</i>     | <i>P00749</i> |
| <i>EGFR</i>     | <i>P00533</i> | <i>PPARA</i>    | <i>Q07869</i> |
| <i>ELANE</i>    | <i>P08246</i> | <i>PPARG</i>    | <i>P37231</i> |
| <i>ESR1</i>     | <i>P03372</i> | <i>SMAD2</i>    | <i>Q6SZW1</i> |
| <i>F2</i>       | <i>P00734</i> | <i>RBP4</i>     | <i>P02753</i> |
| <i>F7</i>       | <i>P08709</i> | <i>SELP</i>     | <i>P16109</i> |
| <i>FGFR1</i>    | <i>P11362</i> | <i>SERPINE1</i> | <i>P05121</i> |
| <i>FGFR2</i>    | <i>P21802</i> | <i>SHBG</i>     | <i>P04278</i> |
| <i>GATM</i>     | <i>P50440</i> | <i>SMAD3</i>    | <i>P84022</i> |
| <i>GC</i>       | <i>P02774</i> | <i>SRC</i>      | <i>P12931</i> |
| <i>GBA</i>      | <i>P04062</i> | <i>SYK</i>      | <i>P43405</i> |
| <i>GSK3B</i>    | <i>P49841</i> | <i>TGFB1</i>    | <i>P01137</i> |
| <i>GSR</i>      | <i>P00390</i> | <i>TGFBR1</i>   | <i>P36897</i> |
| <i>GSTP1</i>    | <i>P09211</i> | <i>TGFBR2</i>   | <i>P37173</i> |
| <i>HDAC8</i>    | <i>Q9BY41</i> | <i>TTR</i>      | <i>P02766</i> |
| <i>HMGCR</i>    | <i>P04035</i> | <i>TYMP</i>     | <i>P19971</i> |
| <i>HSP90AA1</i> | <i>P07900</i> | <i>VCAM1</i>    | <i>P19320</i> |
| <i>YARS1</i>    | <i>P54577</i> | <i>CTSD</i>     | <i>P07339</i> |

---
